# Supplementary material
Source: PubMed Central journal article supplement (PMC5011002)
Supplement: NIHMS808502-supplement-5.pdf [file NIHMS808502-supplement-5.pdf]

**A. H<sub>2</sub>O<sub>2</sub> Pretreated TIB-73 + 60 μM LDL-DHA**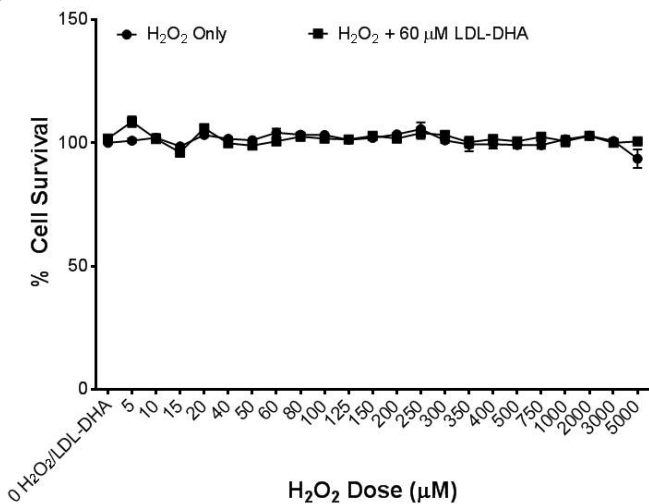**B. Menadione + 60 μM LDL-DHA**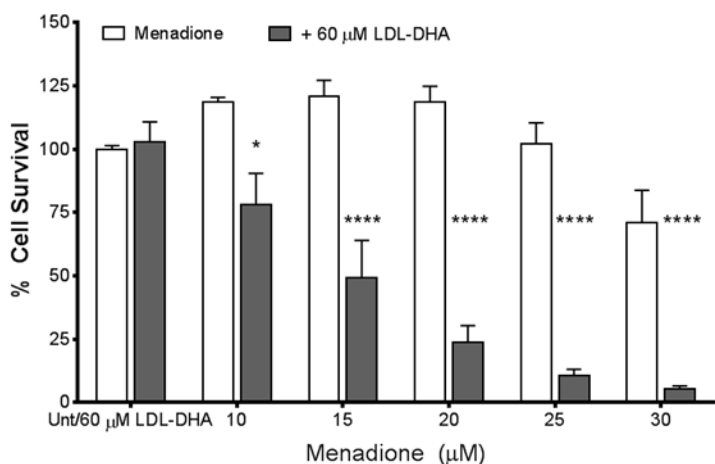**C. TIB-73 Cells with 25 μM Menadione + LDL-DHA**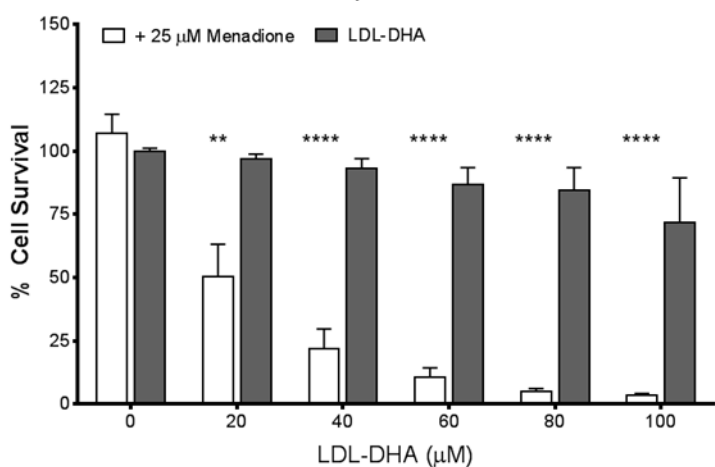

+ 25 μM Menadione IC<sub>50</sub> = 20.32 μM LDL-DHA

LDL-DHA IC<sub>50</sub> = 131.8 μM LDL-DHA
