# Supplementary material
Source: PubMed Central journal article supplement (PMC5011002)

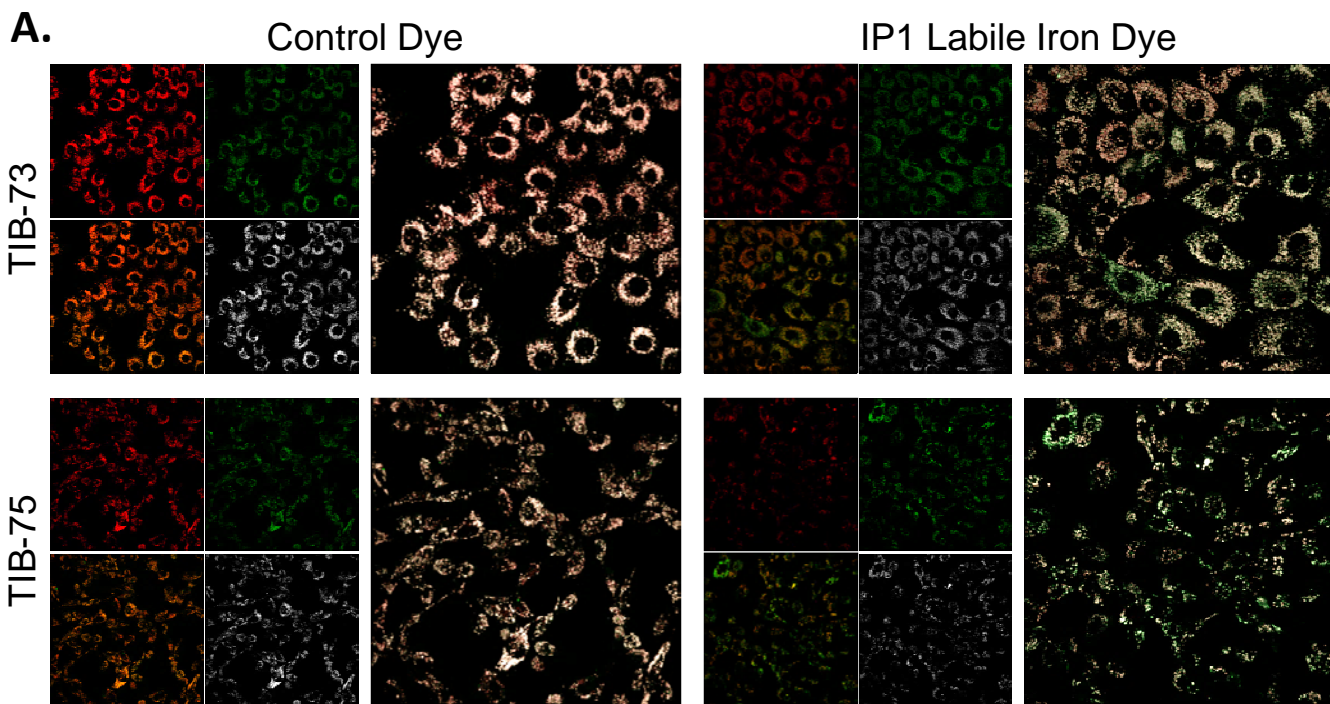

**B. Labile Iron and Lysosome Colocalization**

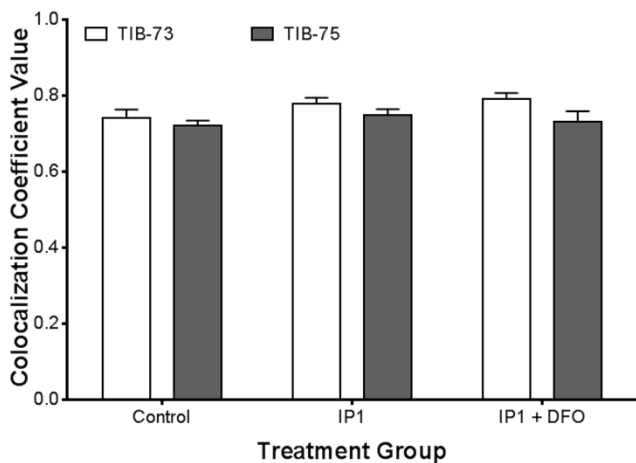

**C. IP1 Fluorescence for Intracellular Labile Iron**

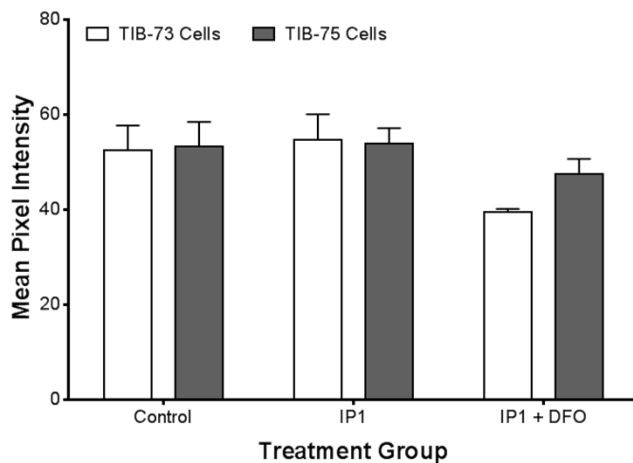

Supplement: NIHMS808502-supplement-10.pdf [file NIHMS808502-supplement-10.pdf]

## A. LDL-DHA & DFO on MMP Loss

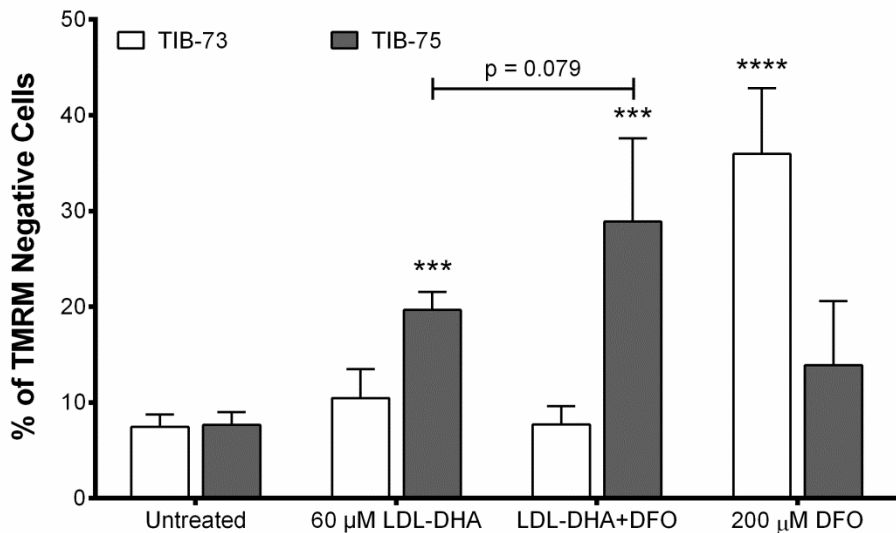

## B. LDL-DHA & DFO on ROS

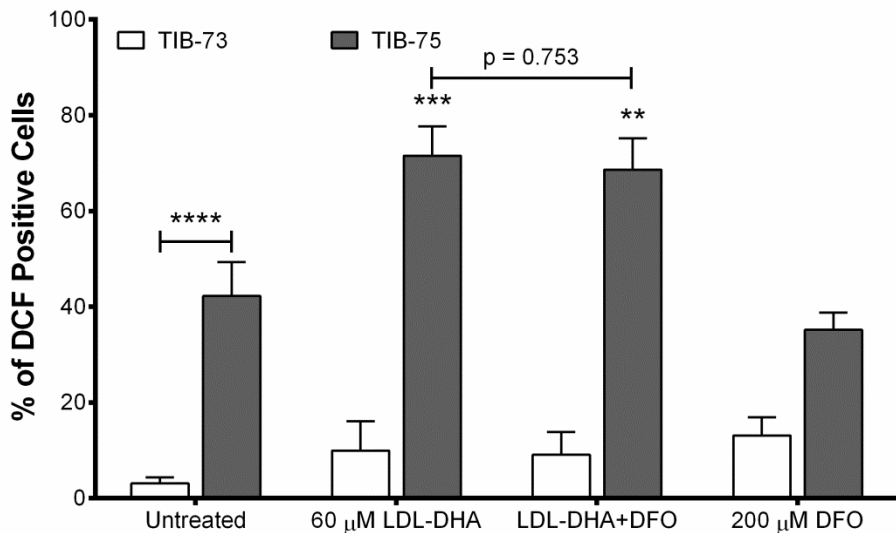

Supplement: NIHMS808502-supplement-11.pdf [file NIHMS808502-supplement-11.pdf]

## TIB-73 Cells with LDL-DHA and FeCl<sub>3</sub>

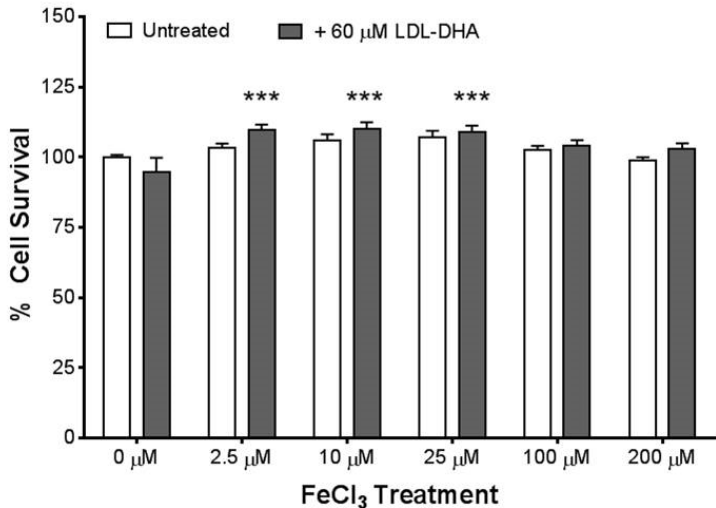

Supplement: NIHMS808502-supplement-12.pdf [file NIHMS808502-supplement-12.pdf]

### Normalized Mean Pixel Intensity

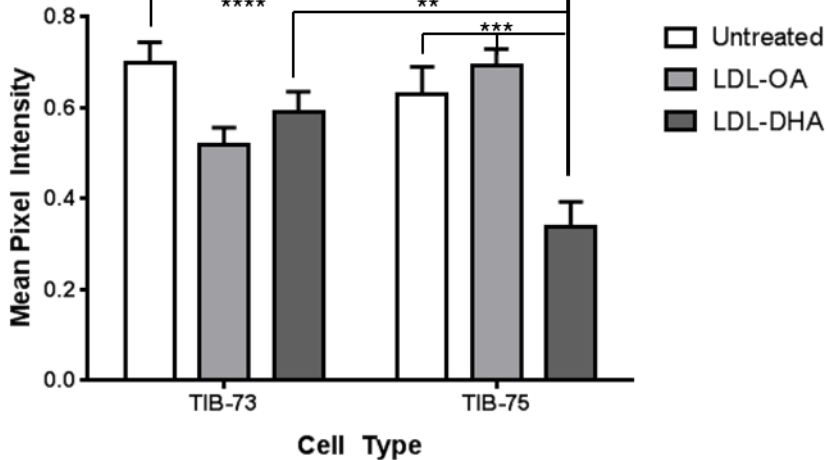

Supplement: NIHMS808502-supplement-13.pdf [file NIHMS808502-supplement-13.pdf]

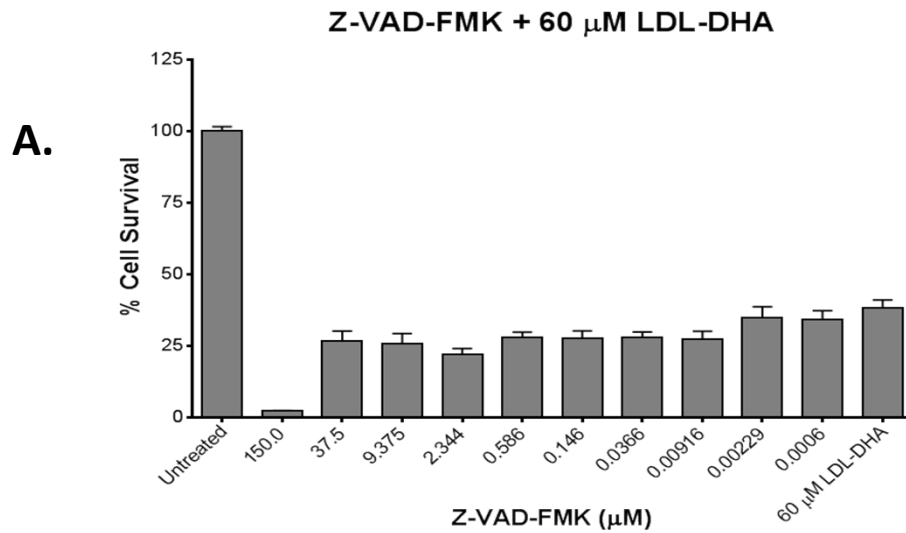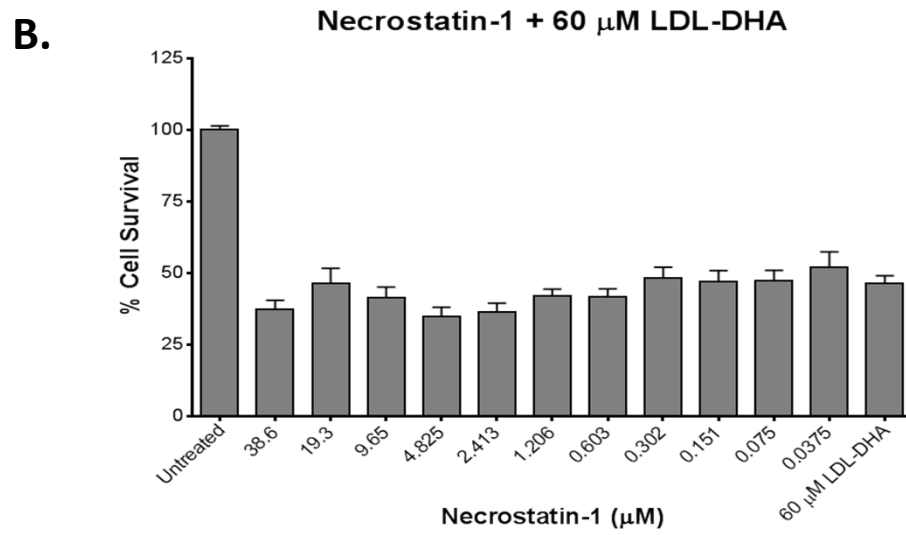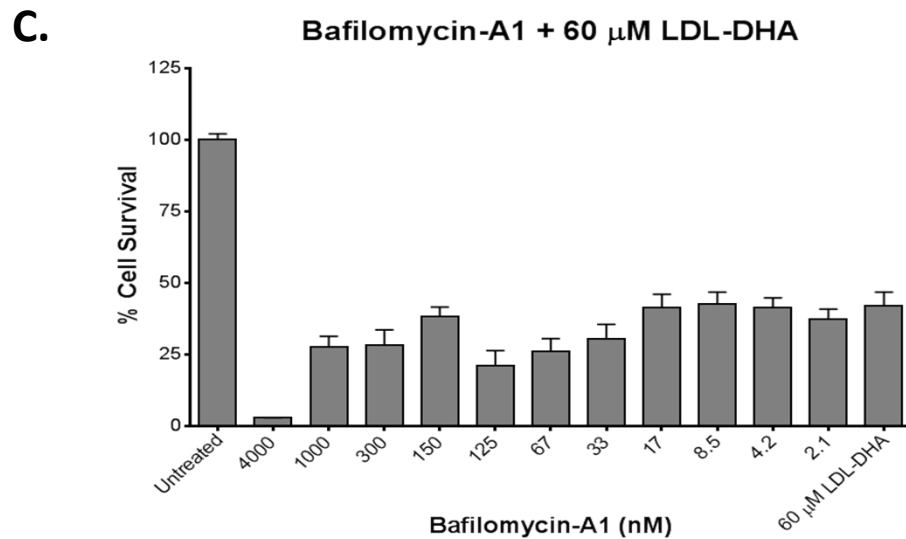

Supplement: NIHMS808502-supplement-4.pdf [file NIHMS808502-supplement-4.pdf]

**TIB-73**

**TIB-75**

**Untreated**

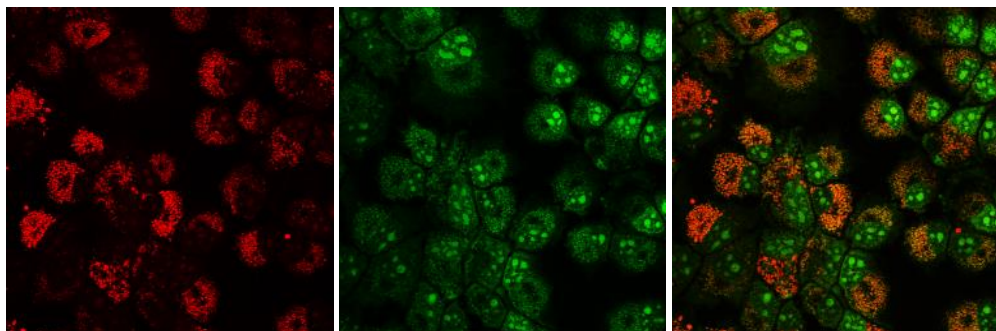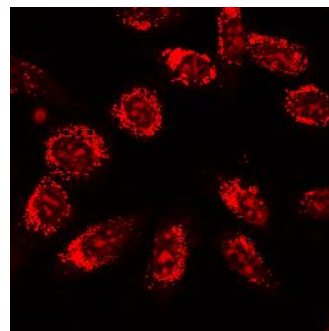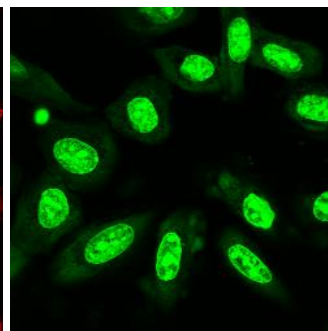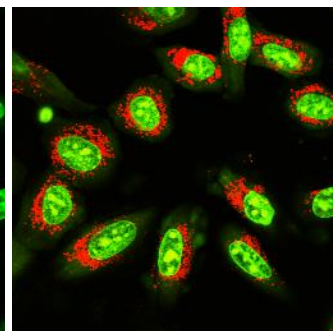

**LDL-OA**

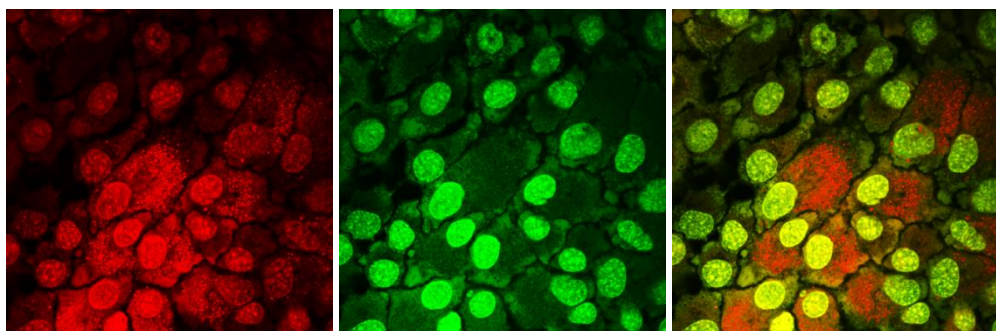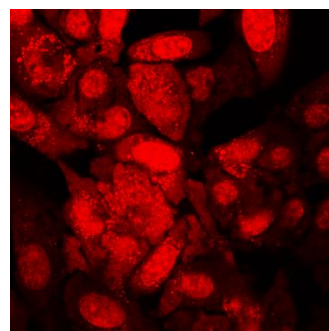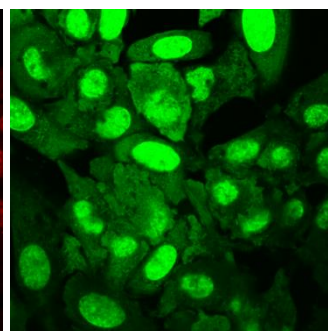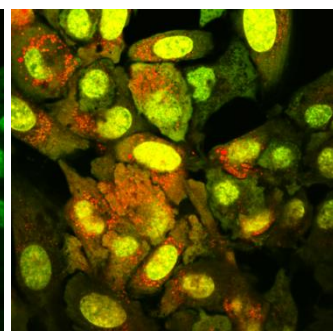

**LDL-DHA**

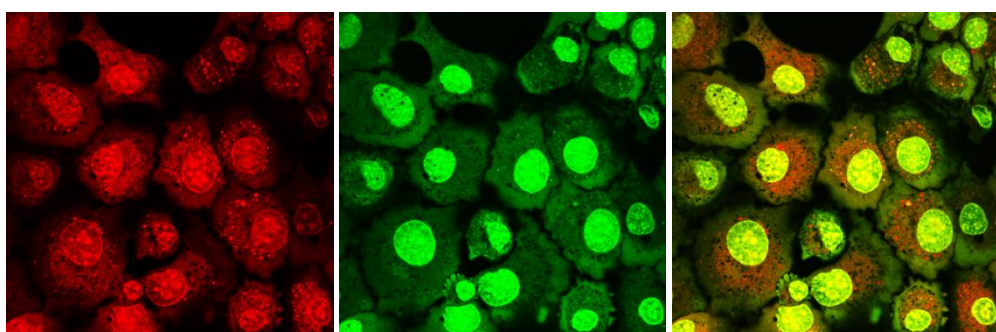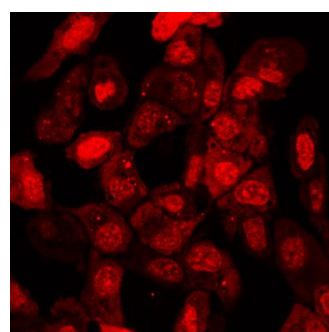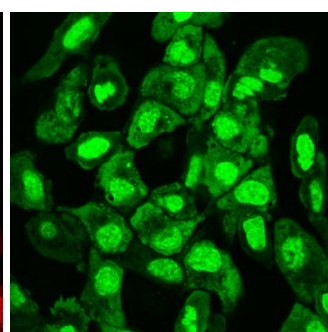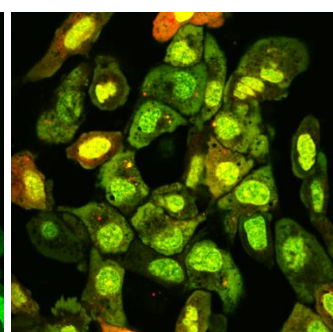

63x

Supplement: NIHMS808502-supplement-6.pdf [file NIHMS808502-supplement-6.pdf]

TIB-73

TIB-75

Untreated

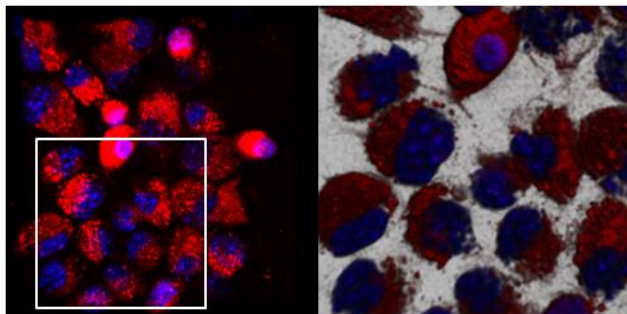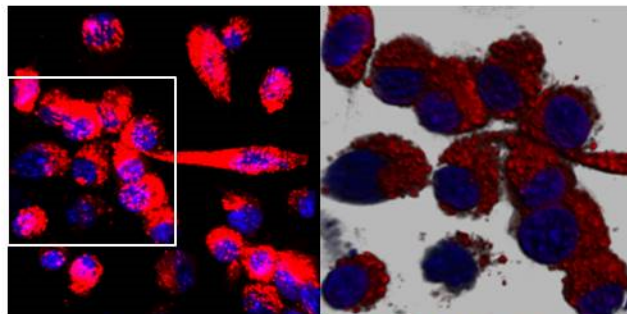

40  $\mu$ M LDL-OA

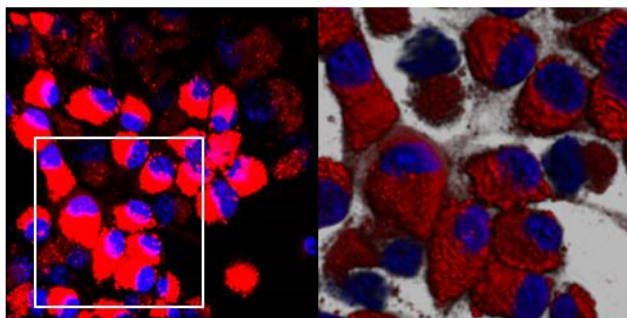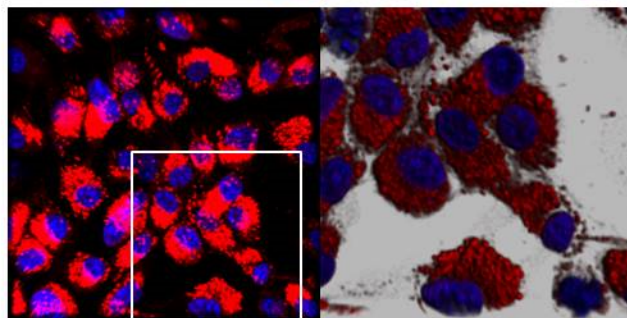

40  $\mu$ M LDL-DHA

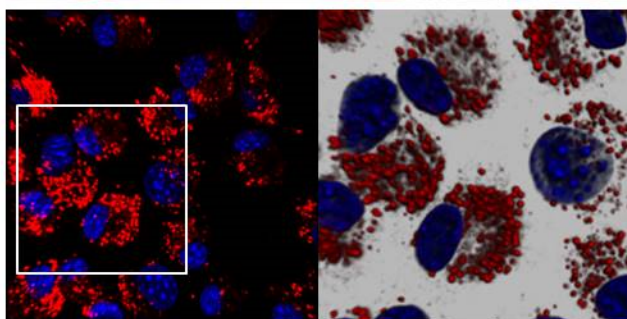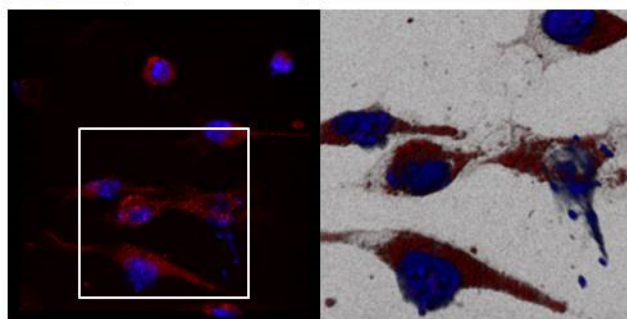

63X

Supplement: NIHMS808502-supplement-7.pdf [file NIHMS808502-supplement-7.pdf]

60  $\mu$ M HSA-DHA

150  $\mu$ M HSA-DHA

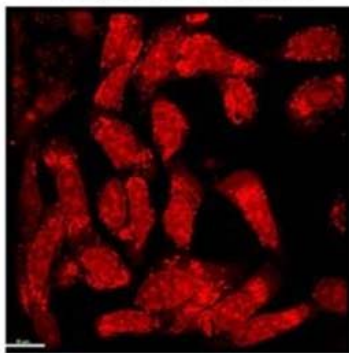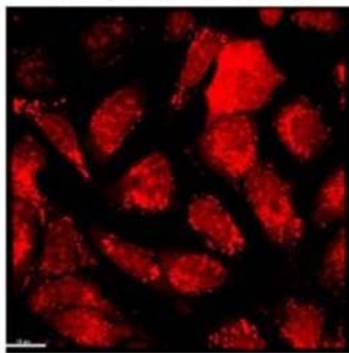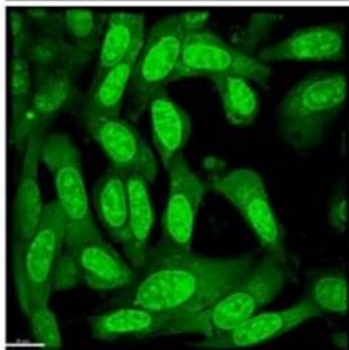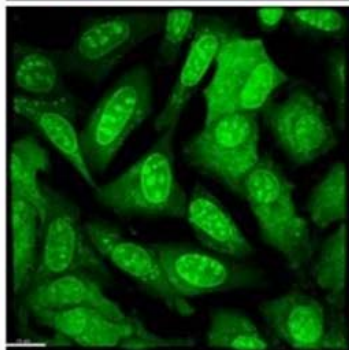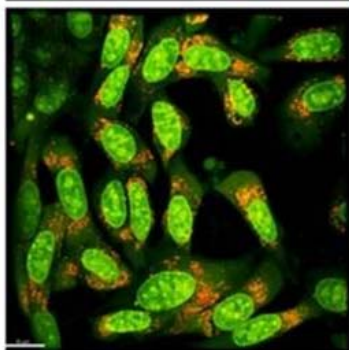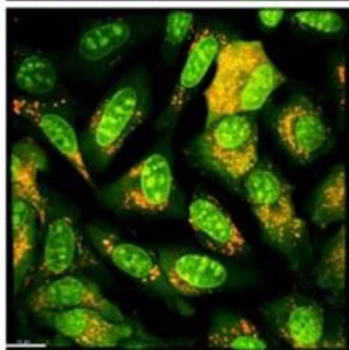

63X

Supplement: NIHMS808502-supplement-8.pdf [file NIHMS808502-supplement-8.pdf]

## Iron by ICP-MS in TIB-73 and TIB-75

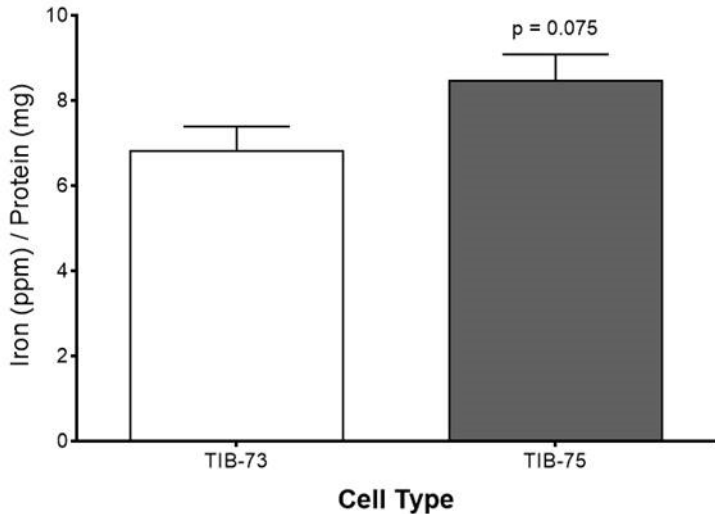

Supplement: NIHMS808502-supplement-9.pdf [file NIHMS808502-supplement-9.pdf]
